# Supplementary material
Source: PubMed Central journal article supplement (PMC6511885)
Supplement: NIHMS983500-supplement-supplement.pdf [file NIHMS983500-supplement-supplement.pdf]

**Supporting Information for**

**An indole-chalcone inhibits multidrug-resistant cancer  
cell growth by targeting microtubules**

## Materials

All purchased reagents and solvents were used without further purification. Silica gel chromatography was performed on Whatman silica gel 60 Å (230–400 mesh). Nuclear magnetic resonance (NMR) spectra ( $^1\text{H}$  and  $^{13}\text{C}$ ) were recorded on a spectrometer (Bruker Ascend 400) and calibrated using the deuterated solvent residual as an internal reference. High-resolution mass spectrometry (HRMS) was performed using a Q-TOF micro mass spectrometer. Purities of the compounds were analyzed by HPLC (Agilent 1100) using an ODS-A column (YMC Pack; 10 × 250 mm, 5 μm) with methanol:H<sub>2</sub>O (100:0 to 80:20 over 20 min and 80:20 thereafter) as the mobile phase with a flow rate of 2 mL/min. The separation was monitored at wavelengths of 254 and 365 nm. The purities of all final compounds were higher than 95%.

Human A549, A549/T, A549/DDP, HCT-116, HCT-116/L, HL60, HL60/DOX, K562, K562/HHT300, CCRF-CEM, and CCRF-CEM/VLB100 cells were authenticated via DNA analysis by Genetica DNA Laboratories (Cincinnati, OH, USA) or by the University of Arizona Genomics Core. Cells were cultured following our standard protocols and tested monthly for *Mycoplasma* contamination. De-identified mobilized peripheral blood (MPB) was obtained after informed consent according to protocols approved by the University of Minnesota Institutional Review Board.

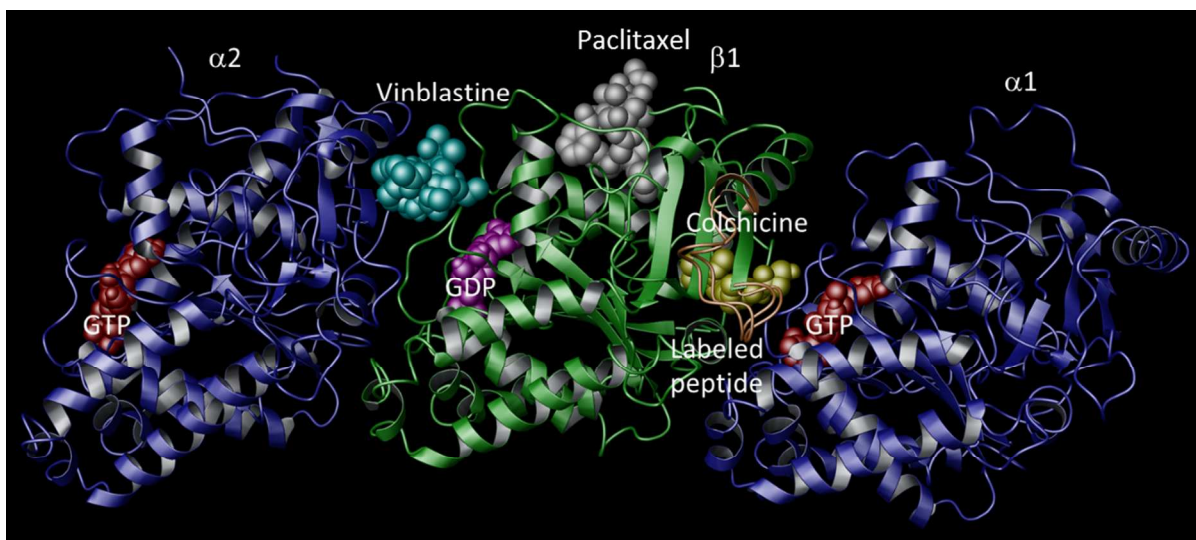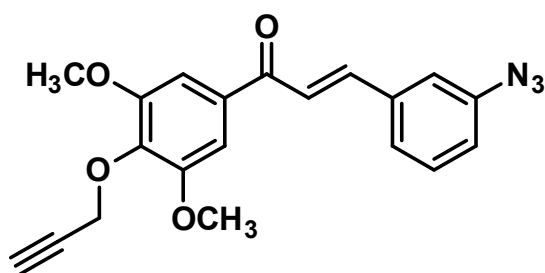

**Negative Probe (1)**  
 $GI_{50} = 28600 \pm 2200$  nM

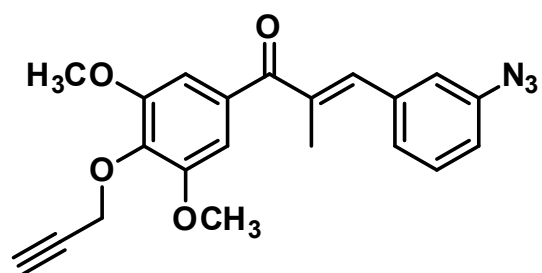

**Positive Probe (2)**  
 $GI_{50} = 380 \pm 10$  nM

Figure S1. Structural assembly of  $\alpha$ - and  $\beta$ -tubulin and its known binding sites for paclitaxel (white), vinblastine (cyan), colchicine (yellow), GDP (red) and GTP (purple) and positive chalcone probe labeled peptide (orange). The structures of probes and their cytotoxicity ( $GI_{50}$ ) towards A549 human non-small lung adenocarcinoma cell line were provided.

## Indole-chalcones and the structure-activity relationship

Based on our previous SAR results <sup>1</sup> that an  $\alpha$ -methyl substitution significantly increased chalcone's cytotoxicity and compound **3** was previously reported as a highly cytotoxic agent <sup>2</sup>, **FC77** and a few analogs were synthesized with their cytotoxicity determined against A549 human non-small lung adenocarcinoma cancer cell line <sup>1, 3-6</sup>. A clear SAR was observed (Table S1). The introduction of an  $\alpha$ -methyl substituent significantly increased the cytotoxic potency (two probe with a 75-fold difference <sup>1, 6</sup>, **3** and **FC77** with a 14-fold difference, and **5** and **6** with a 30-fold difference). The chalcones with an indole moiety (**3** – **9**) had potent cytotoxicity against A549 cancer cells with the GI<sub>50</sub> values in the low nanomolar to low micromolar range. The free 1-amino group of indole is critical to the cytotoxicity as the compounds with 1-amino substitutions showed 40-, 2- and 19-fold loss in potency comparing **3** and **5**, **3** and **9**, and **FC77** and **6**, respectively. A 5-bromo substitution was highly unfavorable to the cytotoxicity (**3** and **8** with a 178-fold difference). A 2-methyl substitution also led to significant loss of cytotoxicity (**5** and **9** with a 15-fold difference). These chalcones with the addition of **10** and **11** were docked into the colchicine-binding site (**10** and **11** were selected in order to cover a wider range of cytotoxicity because they are much less cytotoxic, particularly **11**).

**Table S1.** The structures and the 48-hour cytotoxicity of the indole chalcones towards A549 human non-small lung adenocarcinoma cell line.

| Entry           | Structure                                                                          | A549 GI <sub>50</sub> (nM) | Entry                  | Structure                                                                          | A549 GI <sub>50</sub> (nM) |
|-----------------|------------------------------------------------------------------------------------|----------------------------|------------------------|------------------------------------------------------------------------------------|----------------------------|
| <b>3</b>        | 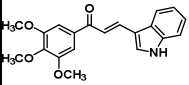  | 38±3                       | <b>8</b>               |  | 6630±570                   |
| <b>4 (FC77)</b> |   | 2.7± 0.4                   | <b>9</b>               |  | 77±8                       |
| <b>5</b>        |   | 1510±210                   | <b>10</b> <sup>1</sup> |  | 920± 180                   |
| <b>6</b>        |   | 50±5                       | <b>11</b> <sup>1</sup> |  | >60000                     |
| <b>7</b>        |  | 560±32                     |                        |                                                                                    |                            |

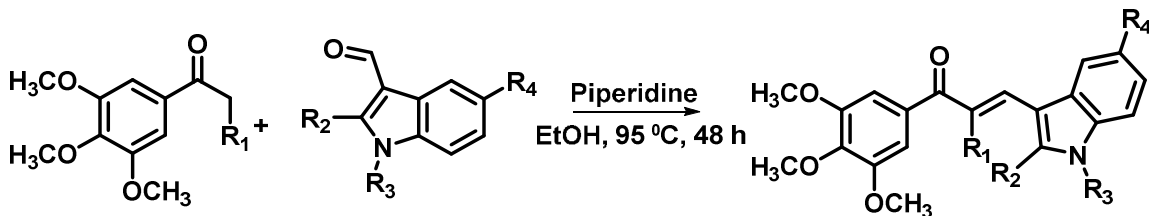

**Scheme S1.** Synthesis of indole-chalcones.

(*E*)-3-(1*H*-indol-3-yl)-1-(3,4,5-trimethoxyphenyl)prop-2-en-1-one (**3**)<sup>7</sup>

Recrystallization yield: 10%. <sup>1</sup>H NMR (400MHz, CDCl<sub>3</sub>): δ 8.71 (1H, br, NH), 8.13 (1H, d, *J* = 15.6 Hz, =CH), 8.00 (1H, m, Ar-H), 7.63 (1H, s, Ar-H), 7.55 (1H, d, *J* = 15.2 Hz, =CH), 7.46 (1H, m, Ar-H), 7.31 (4H, m, Ar-H), 3.96 (9H, s, 3OCH<sub>3</sub>). <sup>13</sup>C NMR (100MHz, CDCl<sub>3</sub>): δ 189.86, 153.10, 138.78, 137.23, 134.44, 130.08, 123.57, 120.54, 117.82, 114.52, 111.99, 105.96, 60.97, 56.40. HRMS (ESI<sup>+</sup>) *m/z* Calculated for C<sub>20</sub>H<sub>19</sub>NO<sub>4</sub> 338.1387; Observed 338.1385 (M+H<sup>+</sup>). HPLC Purity: 97.8%, R<sub>t</sub> = 35.70 min, UV 254 nm.

Intermediate 1: 1-(prop-2-yn-1-yl)-1*H*-indole-3-carbaldehyde<sup>8</sup>

Recrystallization yield: 38.2%. <sup>1</sup>H NMR (400MHz, CDCl<sub>3</sub>): δ 10.03 (1H, s, CHO), 8.34 (1H, dd, *J*<sub>1</sub> = 1.6 Hz, *J*<sub>2</sub> = 8.3 Hz, Ar-H), 7.90 (1H, s, Ar-H), 7.32-7.44 (3H, m, Ar-H), 4.94 (2H, s, CH<sub>2</sub>), 2.55 (1H, s, alkynyl-H). <sup>13</sup>C NMR (100MHz, CDCl<sub>3</sub>): δ 184.58, 137.46, 136.80, 125.54, 124.28, 123.30, 123.30, 122.34, 118.70, 109.81, 75.81, 75.57, 36.65.

(*E*)-3-(1-(prop-2-yn-1-yl)-1*H*-indol-3-yl)-1-(3,4,5-trimethoxyphenyl)prop-2-en-1-one (**5**)

Recrystallization yield: 28.4%.  $^1\text{H}$  NMR (400MHz,  $\text{CDCl}_3$ ):  $\delta$  8.09 (1H, d,  $J = 15.6$  Hz, =CH), 8.01 (1H, d,  $J = 7.8$  Hz, Ar-H), 7.67 (1H, s, Ar-H), 7.52 (2H, m, =CH), 7.30-7.39 (4H, m, Ar-H), 4.93 (2H, s,  $\text{CH}_2$ ), 3.97 (6H, s,  $2\text{OCH}_3$ ), 3.94 (3H, s,  $\text{OCH}_3$ ), 2.51 (1H, s, alkynyl-H).  $^{13}\text{C}$  NMR (100MHz,  $\text{CDCl}_3$ ):  $\delta$  189.66, 153.10, 142.00, 138.22, 137.18, 134.43, 132.38, 123.48, 121.98, 121.68, 120.82, 117.75, 113.77, 110.23, 105.95, 74.85, 60.97, 56.41, 36.30. HRMS ( $\text{ESI}^+$ )  $m/z$  Calculated for  $\text{C}_{23}\text{H}_{21}\text{NO}_4$  376.1543; Observed 376.1542 ( $\text{M}+\text{H}^+$ ). HPLC Purity: 97.7%,  $R_t = 14.33$  min, UV 254 nm.

(*E*)-3-(1*H*-indol-3-yl)-2-methyl-1-(3,4,5-trimethoxyphenyl)prop-2-en-1-one (**6**)

Recrystallization yield: 4.3%.  $^1\text{H}$  NMR (400MHz,  $\text{CDCl}_3$ ):  $\delta$  7.66 (2H, s, =CH, Ar-H), 7.58 (1H, d,  $J = 7.3$  Hz, Ar-H), 7.45 (1H, d,  $J = 7.6$  Hz, Ar-H), 7.36 (1H, m, Ar-H), 7.16-7.23 (1H, m, Ar-H), 7.03 (2H, s, Ar-H), 4.98 (2H, s,  $\text{CH}_2$ ), 3.95 (6H, s,  $2\text{OCH}_3$ ), 3.90 (3H, s,  $\text{OCH}_3$ ), 2.51 (1H, s, alkynyl-H), 2.34 (3H, s,  $\text{CH}_3$ ).  $^{13}\text{C}$  NMR (100MHz,  $\text{CDCl}_3$ ):  $\delta$  197.84, 152.78, 140.75, 135.54, 134.51, 134.02, 131.65, 128.77, 128.73, 123.32, 121.25, 118.77, 112.72, 109.80, 106.93, 74.59, 60.98, 56.26, 36.39, 15.46. HRMS ( $\text{ESI}^+$ )  $m/z$  Calculated for  $\text{C}_{24}\text{H}_{23}\text{NO}_4$  390.1700; Observed 390.1697 ( $\text{M}+\text{H}^+$ ). HPLC Purity: 95.50%,  $R_t = 9.35$  min, UV 365 nm.

(*E*)-3-(2-methyl-1*H*-indol-3-yl)-1-(3,4,5-trimethoxyphenyl)prop-2-en-1-one (**7**)

Recrystallization yield: 7.2%.  $^1\text{H}$  NMR (400MHz,  $\text{CDCl}_3$ ):  $\delta$  8.37 (1H, br, NH), 8.17 (1H, d,  $J = 15.4$  Hz, =CH), 7.95 (d,  $J = 7.3$  Hz, Ar-H), 7.54 (1H, d,  $J = 15.4$  Hz, =CH), 7.37 (1H, m, Ar-H), 7.33 (2H, s, Ar-H), 7.29 (1H, m, Ar-H), 3.97 (6H, s,  $2\text{OCH}_3$ ), 3.95 (3H, s,  $\text{OCH}_3$ ), 2.64 (3H, s,  $\text{CH}_3$ ).  $^{13}\text{C}$  NMR (100MHz,  $\text{DMSO}-d_6$ ):  $\delta$  188.31, 153.23, 144.42, 141.56, 138.12, 136.53, 134.76, 126.29, 122.50, 121.64, 120.55, 114.75, 111.92,

109.60, 105.97, 60.59, 56.51, 12.41. HRMS (ESI<sup>+</sup>) m/z Calculated for C<sub>21</sub>H<sub>21</sub>NO<sub>4</sub> 352.1543; Observed 352.1543 (M+H<sup>+</sup>). HPLC Purity: 98.5%, R<sub>t</sub> = 17.91 min, UV 254 nm.

*(E)*-3-(5-bromo-1*H*-indol-3-yl)-1-(3,4,5-trimethoxyphenyl)prop-2-en-1-one (**8**)

Recrystallization yield: 15.6%. <sup>1</sup>H NMR (400MHz, CDCl<sub>3</sub>): δ 8.69 (1H, br, NH), 8.13 (1H, s, Ar-H), 8.04 (1H, d, *J* = 15.6 Hz, =CH), 7.62-7.63 (1H, s, Ar-H), 7.51 (1H, d, *J* = 15.6 Hz, =CH), 7.41 (1H, d, *J* = 8.6 Hz, Ar-H), 7.33 (3H, m, Ar-H), 3.97 (6H, s, 2OCH<sub>3</sub>), 3.95 (3H, s, OCH<sub>3</sub>). <sup>13</sup>C NMR (100 MHz, CDCl<sub>3</sub>) δ 189.73, 153.32, 142.33, 137.83, 135.93, 134.31, 130.51, 126.64, 123.55, 118.72, 115.30, 114.27, 113.46, 103.10, 61.15, 56.53. HRMS (ESI<sup>+</sup>) m/z Calculated for C<sub>20</sub>H<sub>18</sub>BrNO<sub>4</sub> 416.0492; Observed 416.0492 (M+H<sup>+</sup>). HPLC Purity: 96.4%, R<sub>t</sub> = 37.92 min, UV 254 nm.

*(E)*-3-(1-methyl-1*H*-indol-3-yl)-1-(3,4,5-trimethoxyphenyl)prop-2-en-1-one (**9**)<sup>7</sup>

Recrystallization yield: 54.1%. <sup>1</sup>H NMR (400 MHz, CDCl<sub>3</sub>) δ 8.06 (1H, d, *J* = 15.5 Hz, =CH), 7.96 (1H, d, *J* = 7.3 Hz, Ar-H), 7.29 – 7.55 (5H, m, =CH, Ar-H), 7.22 (2H, s, Ar-H), 3.93 (6H, s, 2OCH<sub>3</sub>), 3.91 (3H, s, OCH<sub>3</sub>), 3.83 (3H, s, CH<sub>3</sub>). <sup>13</sup>C NMR (100 MHz, CDCl<sub>3</sub>) δ 189.81, 153.19, 141.99, 138.75, 138.39, 134.72, 134.62, 126.28, 123.32, 121.72, 120.76, 116.95, 113.09, 110.32, 105.99, 77.58, 77.16, 76.74, 61.10, 56.51, 33.44. HRMS (ESI<sup>+</sup>) m/z Calculated for C<sub>21</sub>H<sub>21</sub>NO<sub>4</sub> 352.1543; Observed 352.1543 (M+H<sup>+</sup>). HPLC Purity: 95.1%, R<sub>t</sub> = 9.23 min, UV 254 nm.



## Docking and molecular modeling

The positive probe was docked into the colchicine binding site of tubulin (PDB entry: 1SA0) using Schrodinger Glide package with no constraint (Coordinate, X: 40.9, Y: 52.51, Z: -9.03). As shown in Fig. S1, the azide group of the positive probe is within 2.2Å and 2.5Å to the backbone oxygen and the amide sidechain atoms of N349 of the labeled peptide. Using the same method, eleven chalcone compounds (compounds **1-11**) with a wide range of cytotoxicity were docked into the colchicine binding site of tubulin (PDB entry: 1SA0). Their best binding modes were obtained and imported into the atom-based QSAR panel <sup>9</sup>. The model was generated by Schrodinger Phase package using default parameters. The GI<sub>50</sub> and predicted activity values were presented in units of  $-\log$  [concentration,  $\mu\text{M}$ ]. As shown in Fig. S3, the predicted activity and the GI<sub>50</sub> showed a nice correlation with a R<sup>2</sup> value of 0.70.

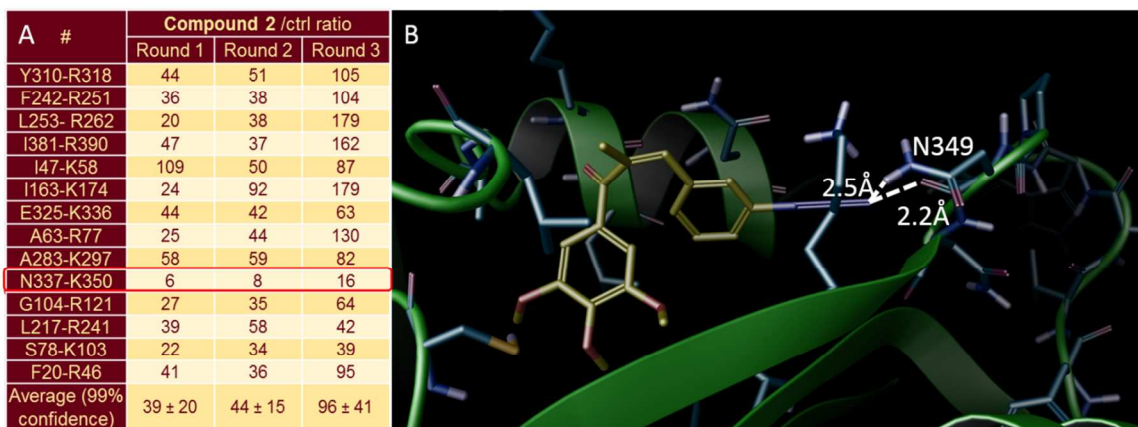

**Figure S2.** (A) Proteomic study suggested the colchicine binding site as the target for the positive chalcone probe <sup>1,6</sup>. (B) Molecular modelling study of this probe showed that the azide group is within 2.2Å and 2.5Å to the backbone oxygen and the amide sidechain atoms of N349 of the labeled peptide.

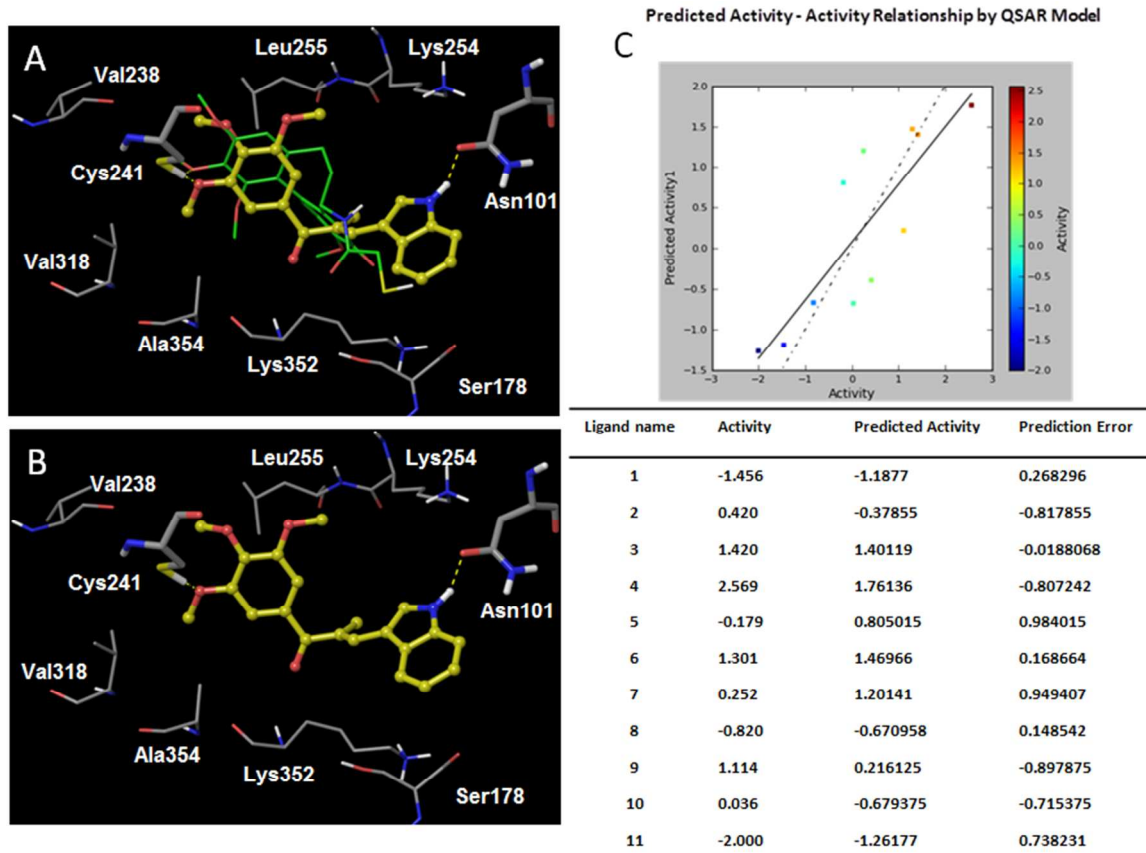

**Figure S3.** Docking studies of **FC77** with tubulin: (A) Superposition of the docked conformation of **FC77** and the original ligand of 1SA0 (colchicine); (B) Predicted binding mode of **FC77** and tubulin. **FC77** was presented in yellow carbons, the original ligand of 1SA0 was in green carbons, the tubulin was in gray carbons with representative amino acids labeled. The nitrogen and oxygen were presented in blue and red, respectively. The hydrogen bonds were labeled in yellow dash line. (C) An atom-based QSAR model was generated by Schrodinger Phase package. The  $GI_{50}$  (activity in the table) and predicted activity values were presented in units of  $-\log$  [concentration,  $\mu\text{M}$ ]. The activity value of compound **11** with a  $GI_{50} > 60 \mu\text{M}$  was presented as -2.0.

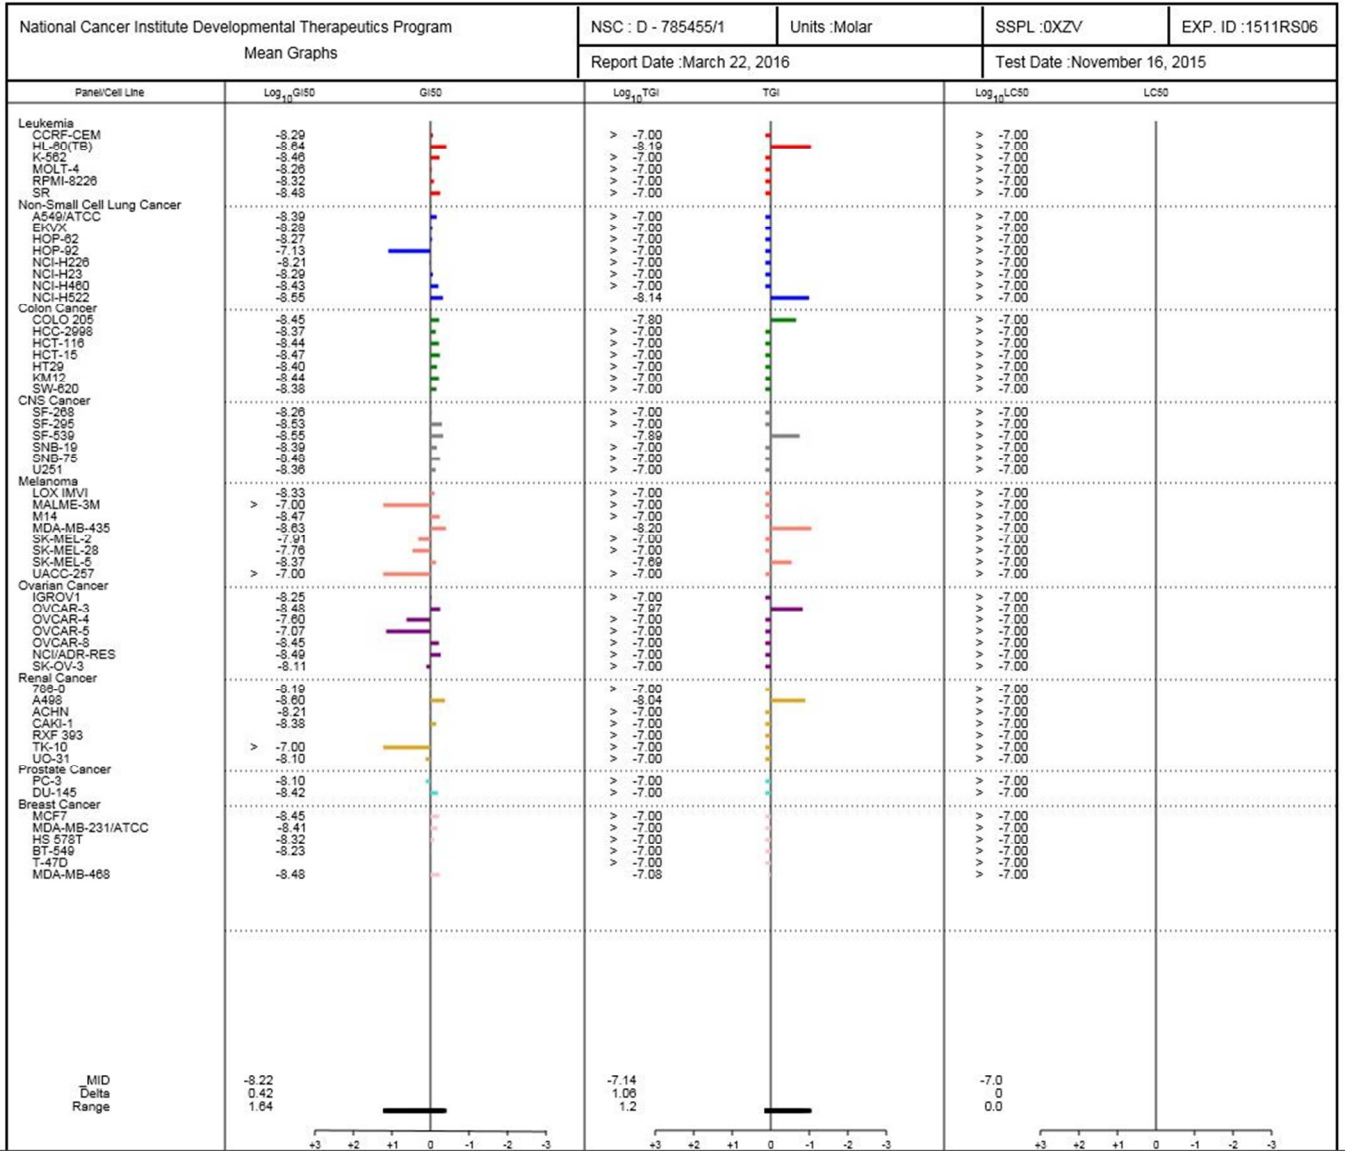

Figure S4. Original NCI-60 data. The Seed NSC of FC77 is D-785455/1.

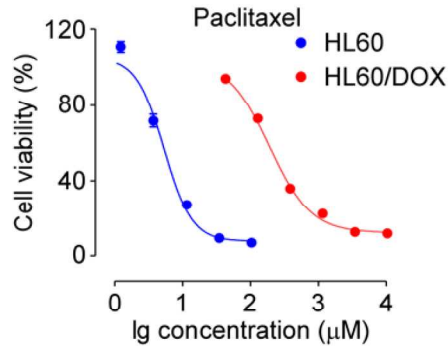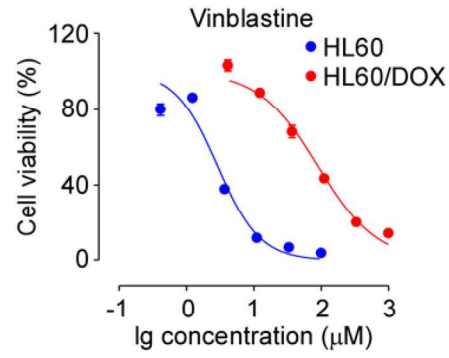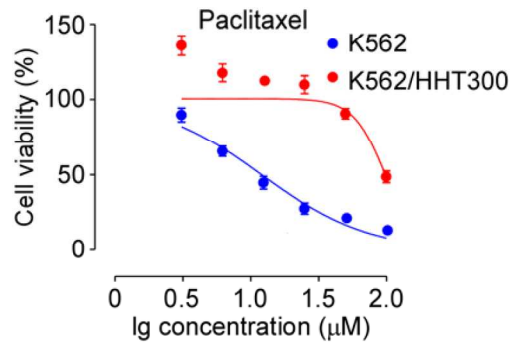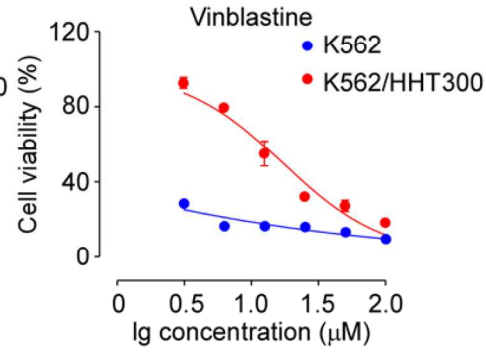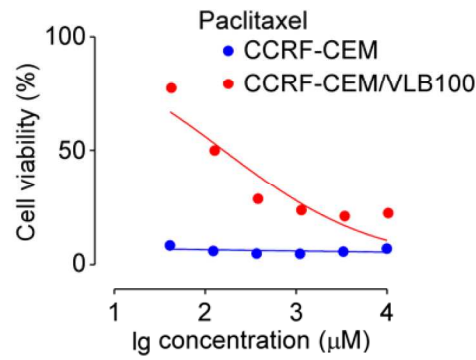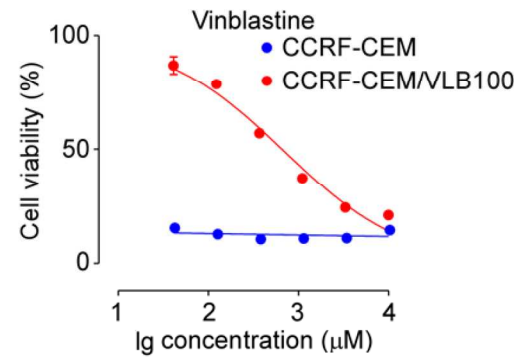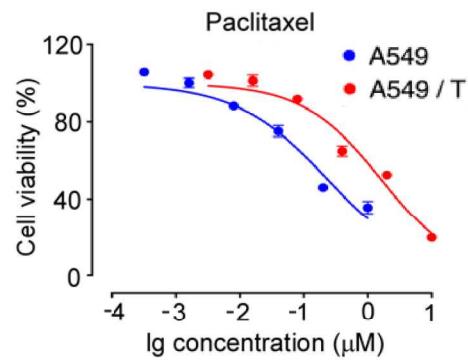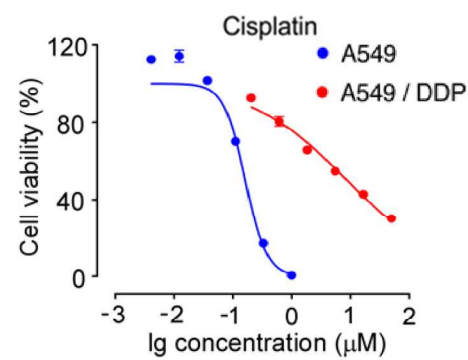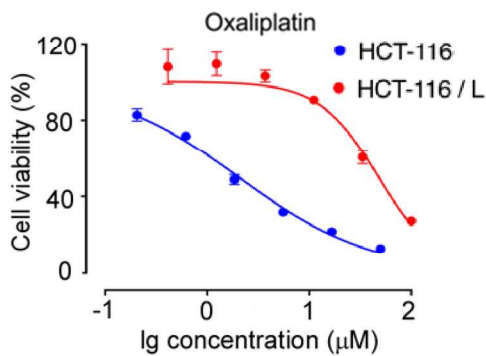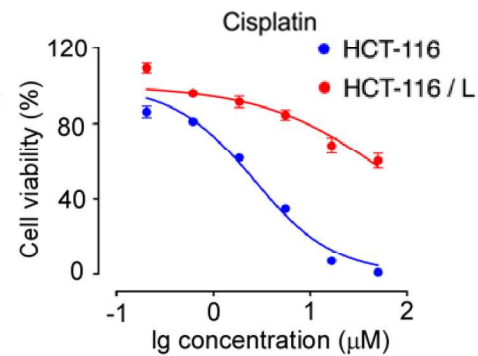

**Figure S5.** Characterization of the multi-drug resistant phenotype of parental and drug-resistant cancer cells.

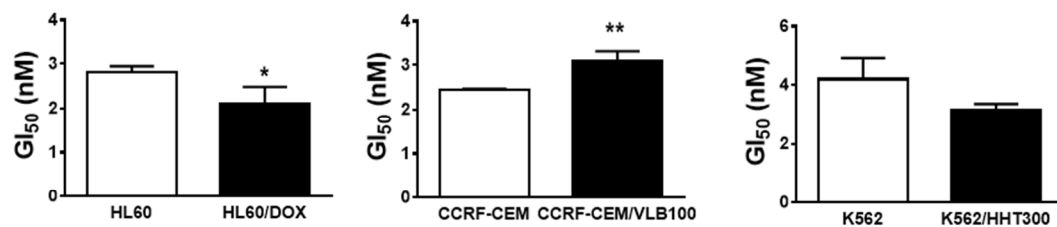

**Figure S6.** Characterization of the cytotoxicity of combretastatin A-4 towards the three multi-drug resistant leukemia cell lines in comparison to their parental cancer cell lines.

\* $p < 0.05$ . \*\* $p < 0.01$ .

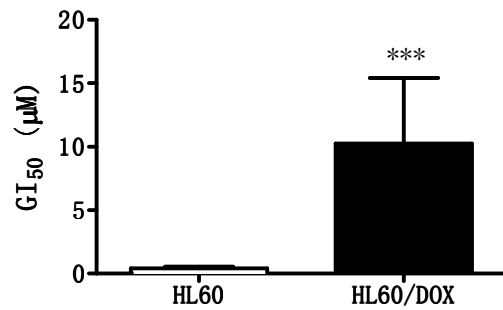

**Figure S7.** Characterization of the cytotoxicity of colchicine towards the HL60 and HL60/DOX. \*\*\* $p < 0.001$ .

# <sup>1</sup>H-NMR and <sup>13</sup>C-NMR

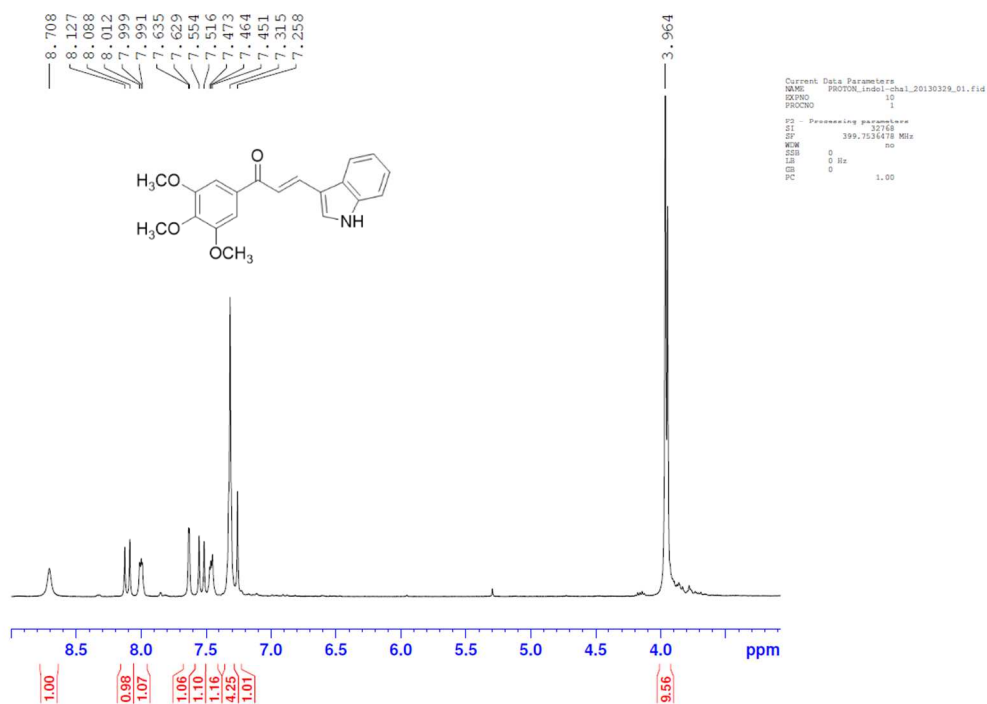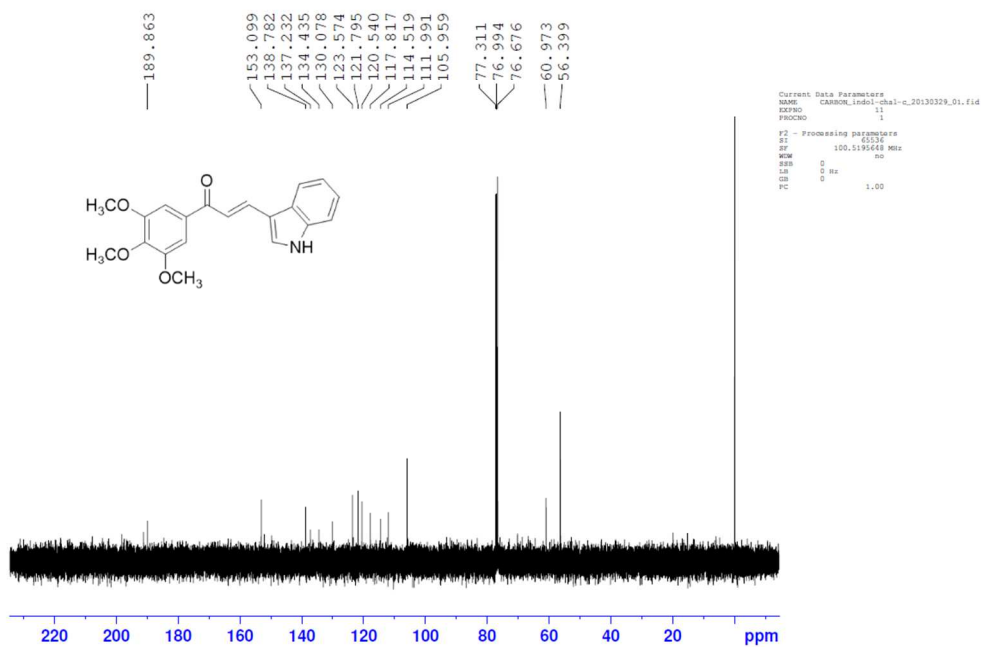



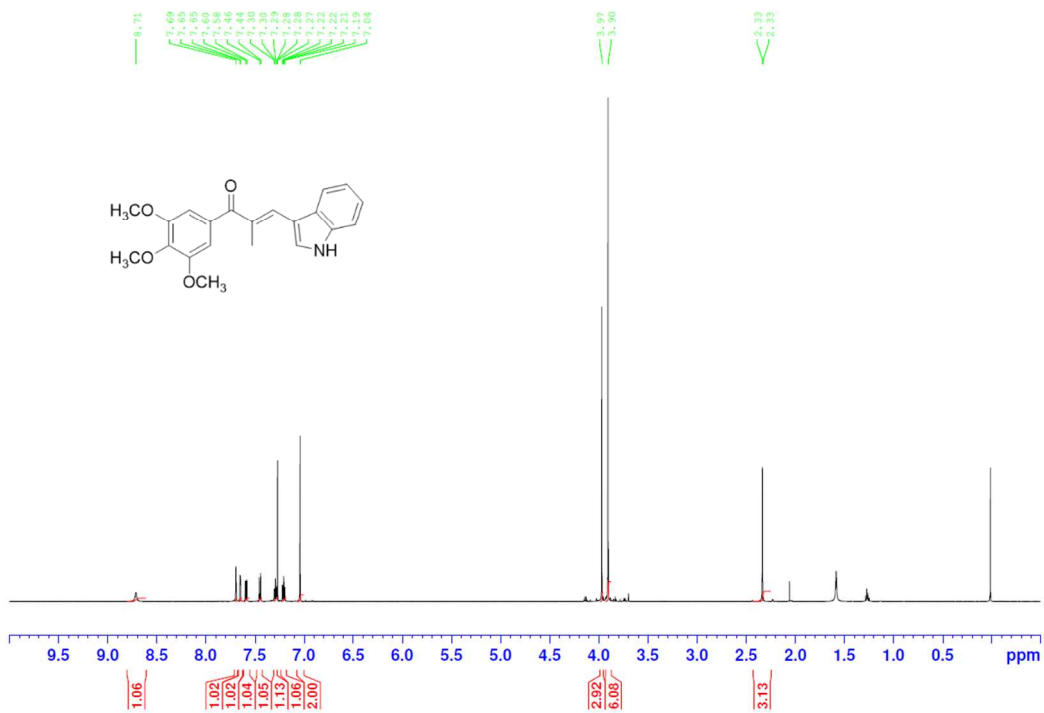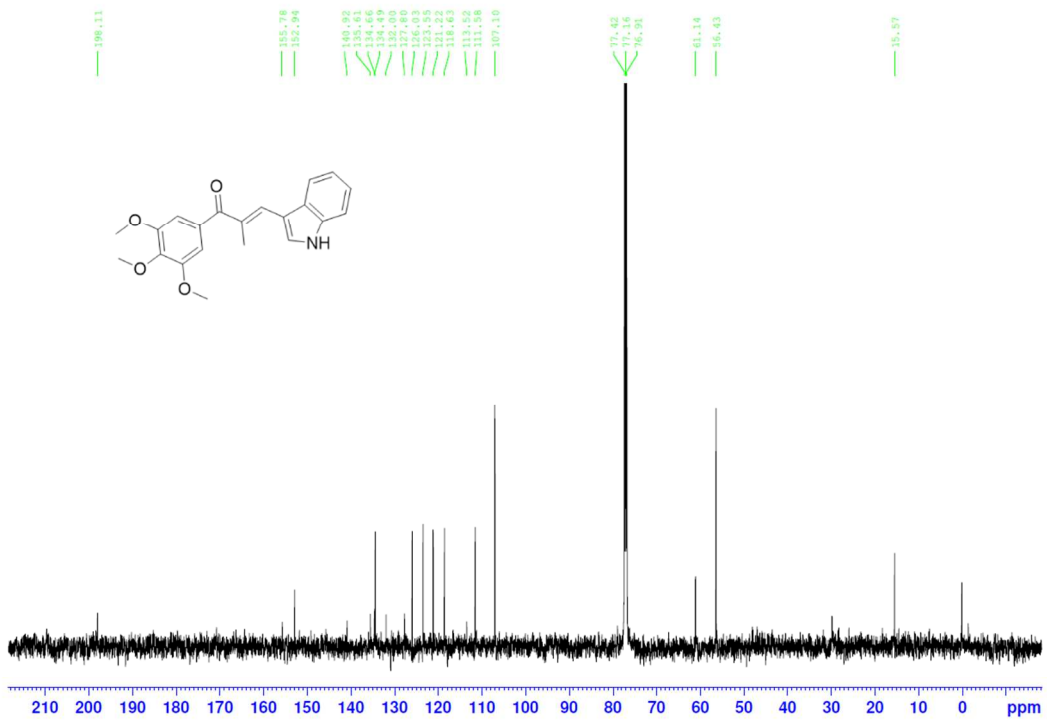

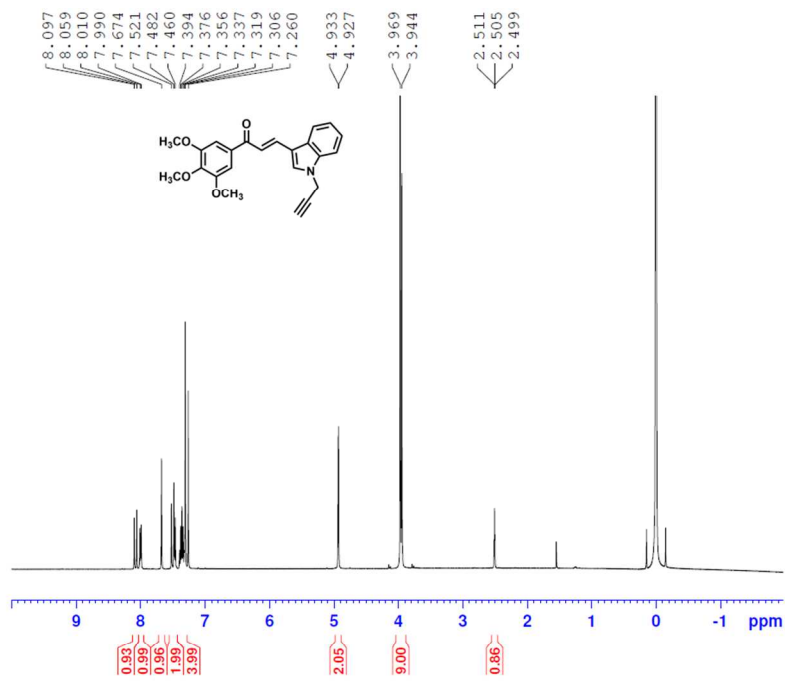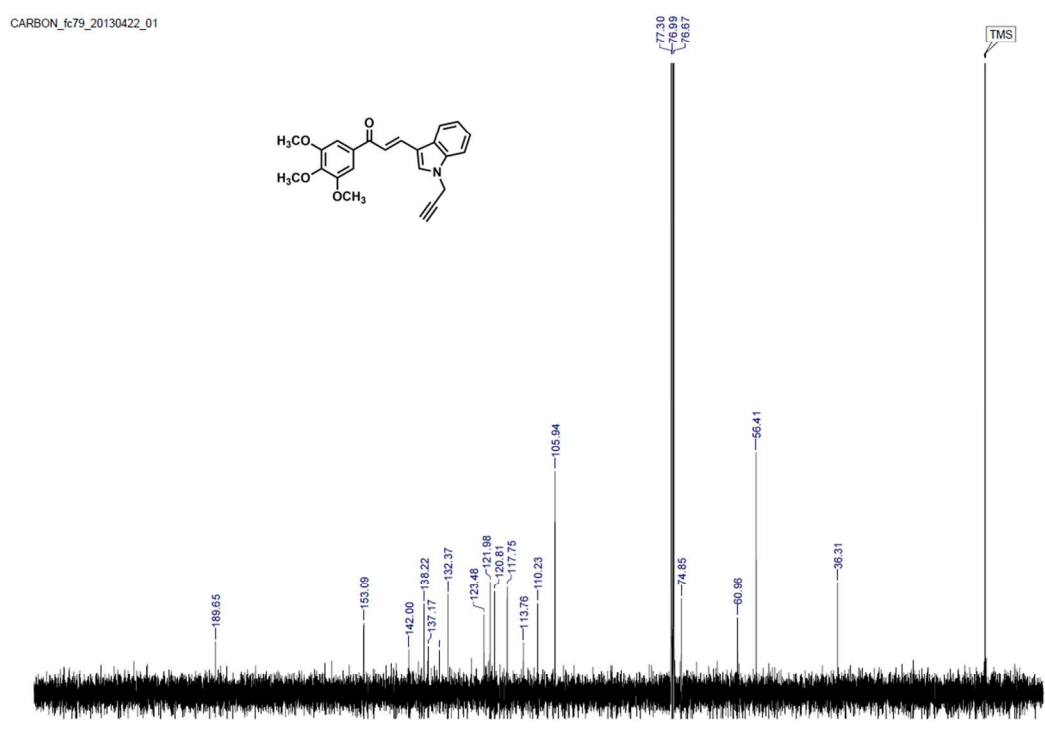

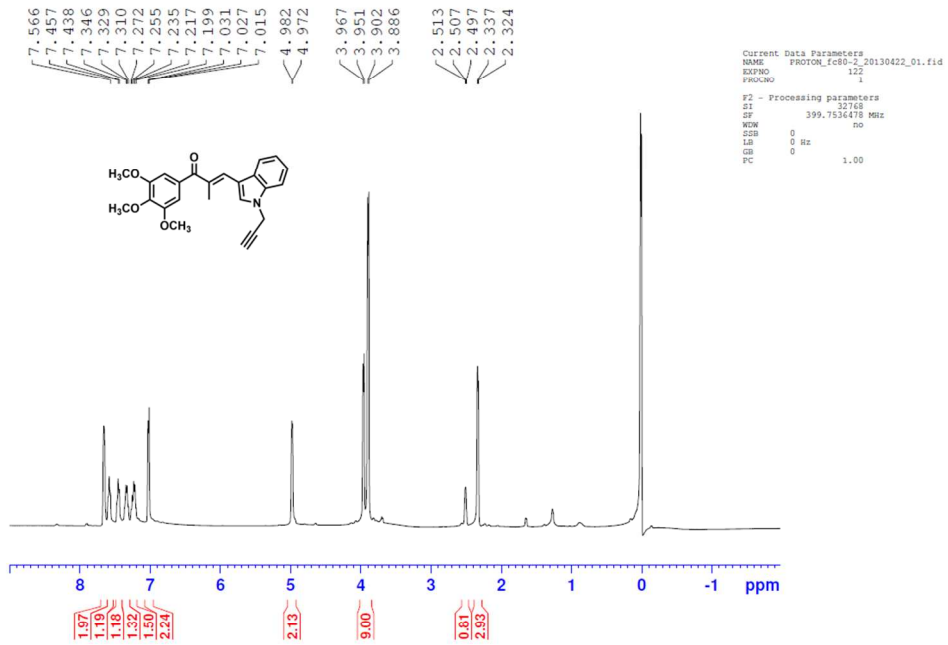

CARBON\_fc80-2\_20130422\_01

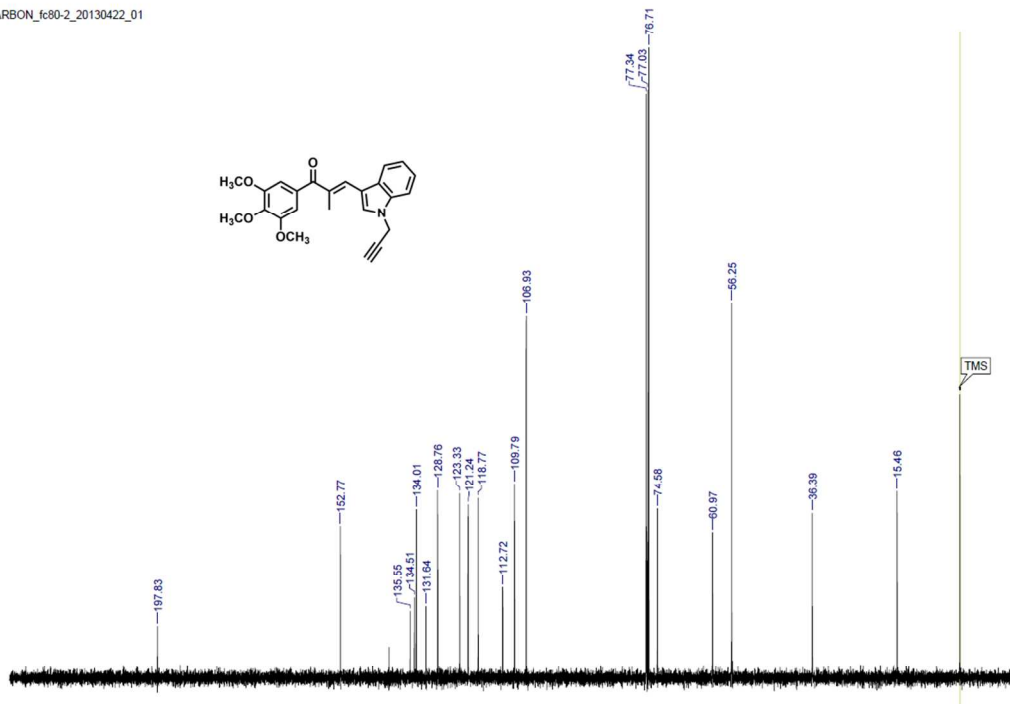

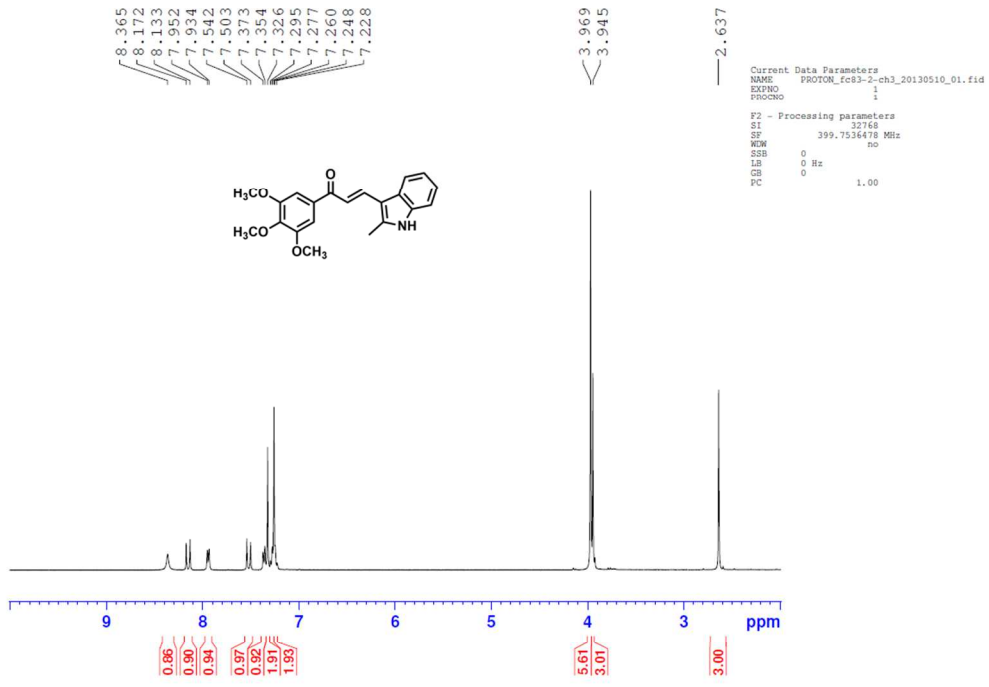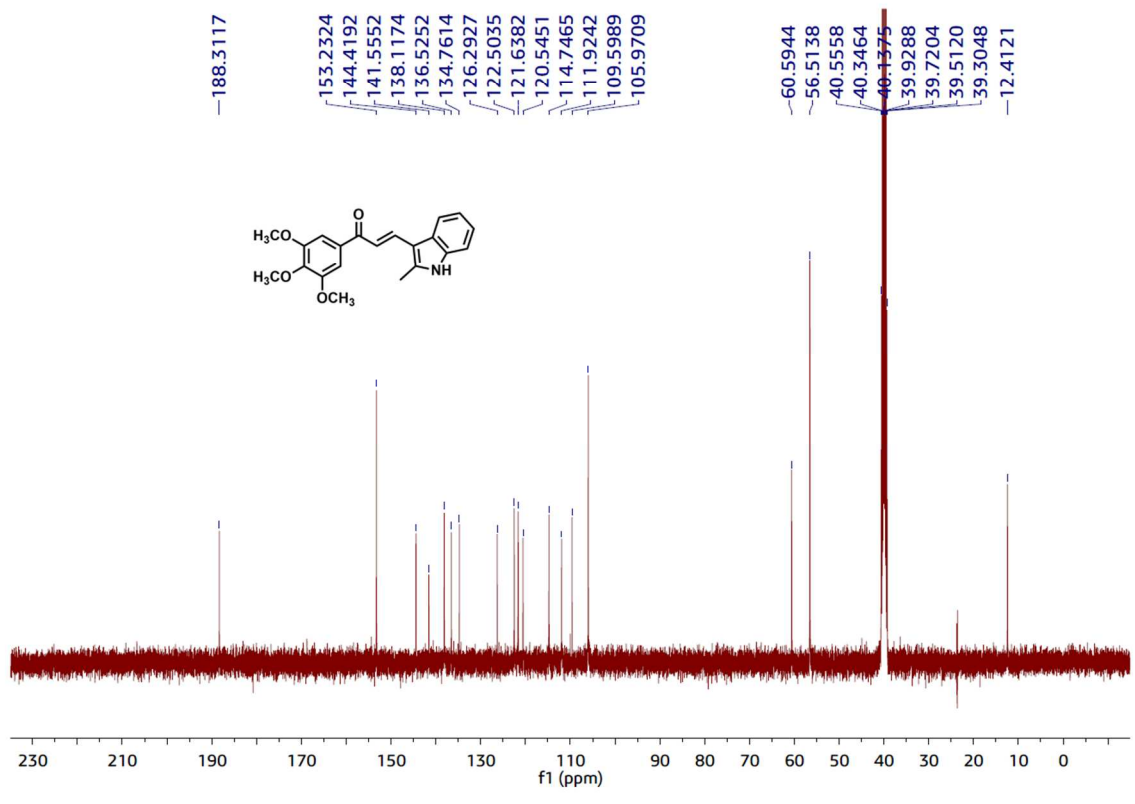

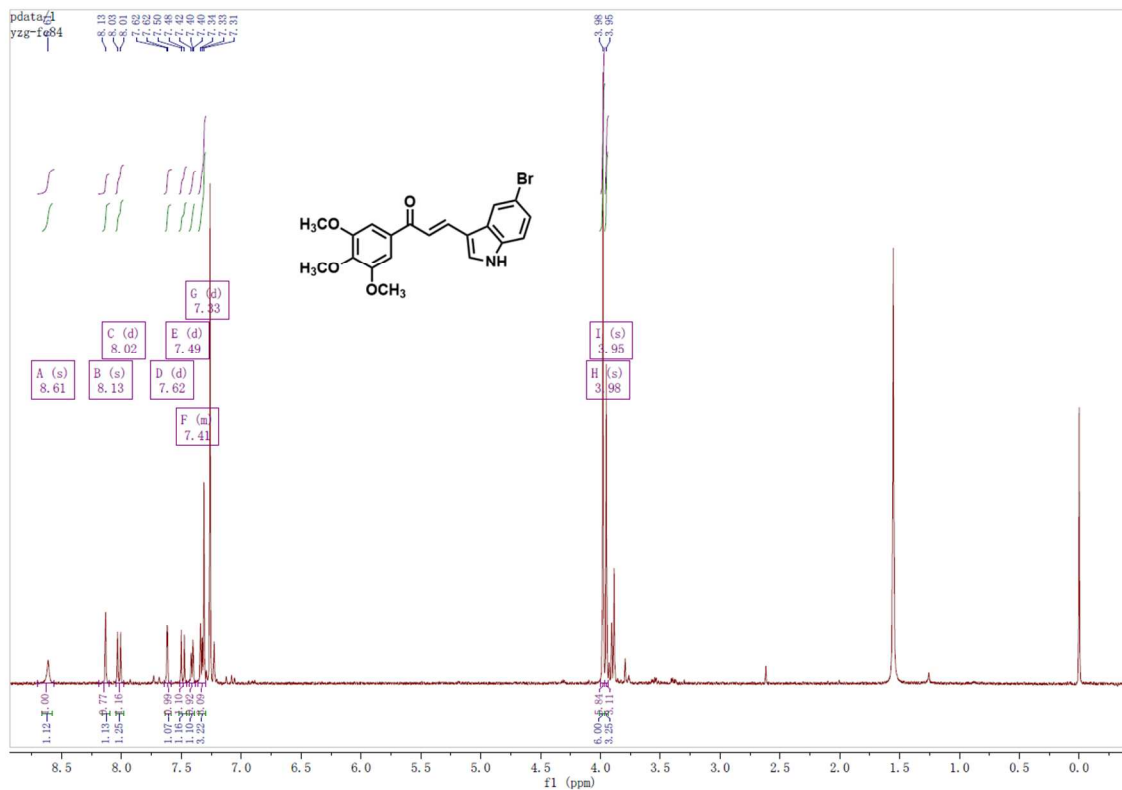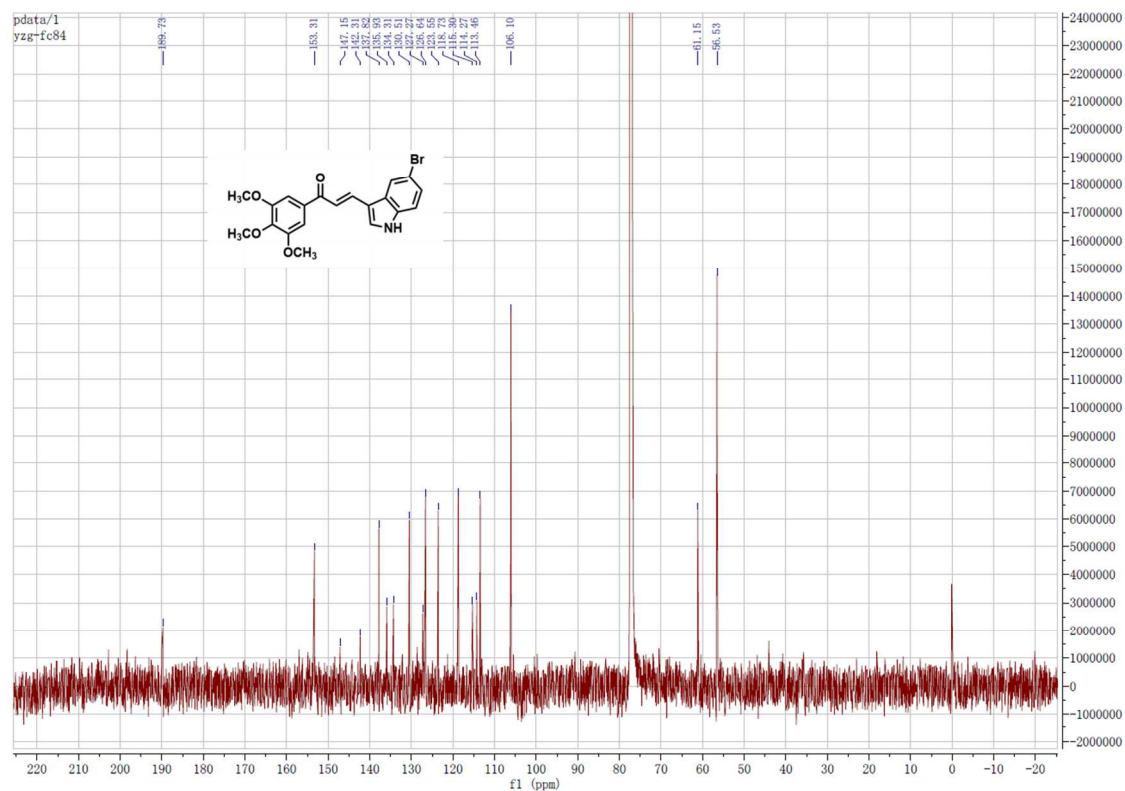

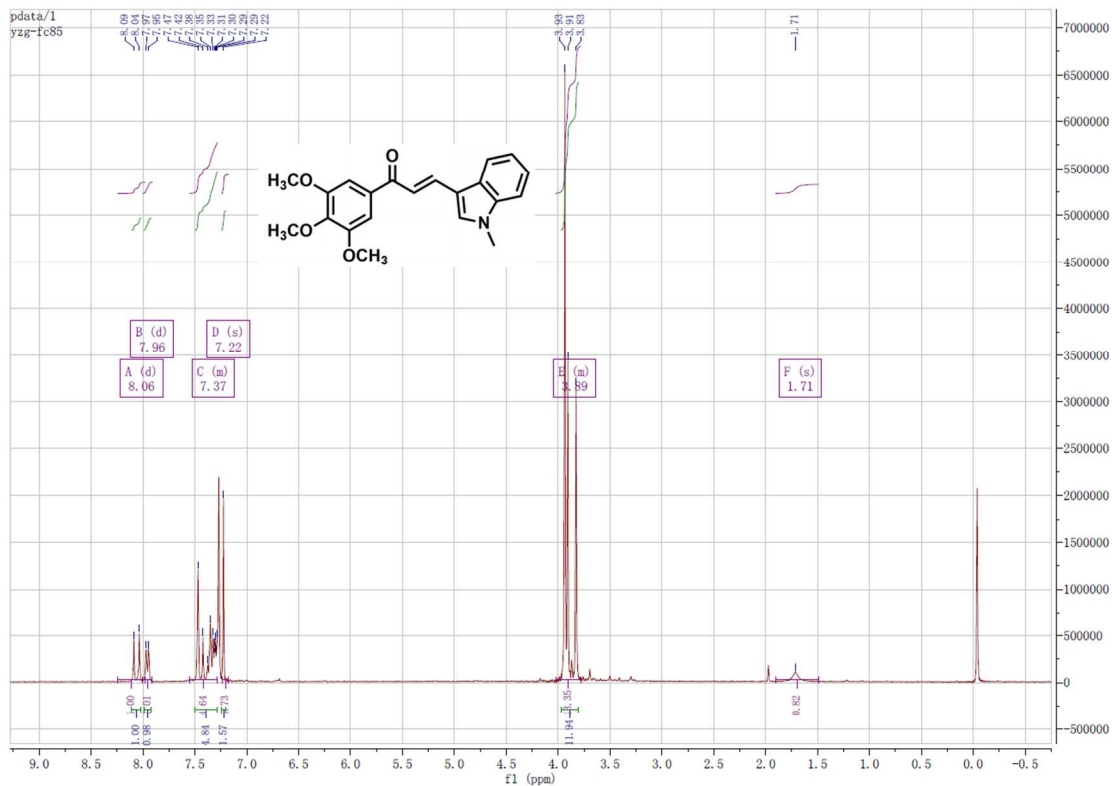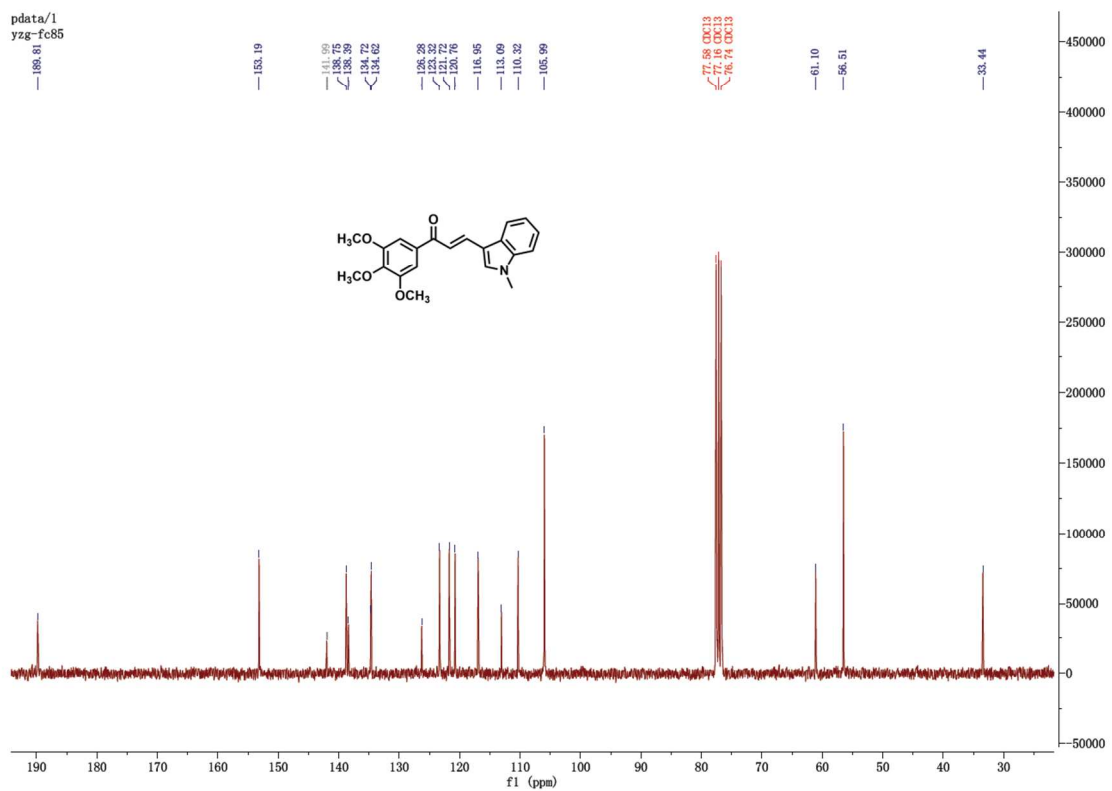

# HPLC purity

## Compound 3

Data File D:\JACK\YZG\XXG000553.D

Sample Name: Fc58

```
=====
Acq. Operator   : Yzg
Location       : Vial 1
Injection Date  : 11-Mar-17, 14:28:35
Acq. Method    : YIZHE SUN.M
Analysis Method: D:\JACK\YIZHE SUN\YIZHE SUN.M
Last changed   : 3/13/2017 1:26:44 PM by ZYB
                (modified after loading)
=====
```

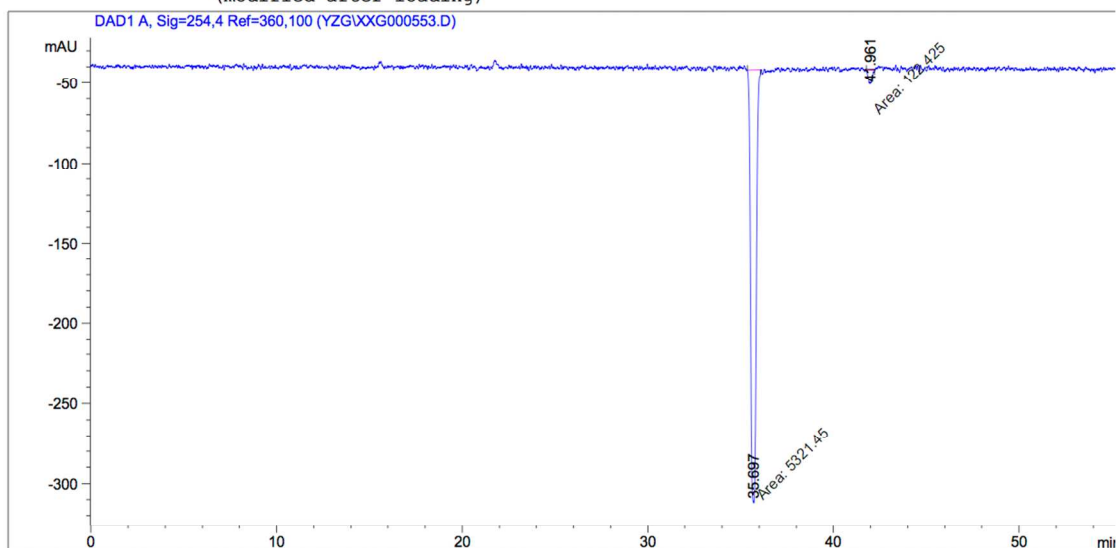

### Area Percent Report

```
Sorted By      : Signal
Multiplier     : 1.0000
Dilution       : 1.0000
Sample Amount  : 1.00000 [ng/ul] (not used in calc.)
Use Multiplier & Dilution Factor with ISTDs
```

Signal 1: DAD1 A, Sig=254,4 Ref=360,100

| Peak # | RetTime [min] | Type | Width [min] | Area [mAU*s] | Height [mAU] | Area %  |
|--------|---------------|------|-------------|--------------|--------------|---------|
| 1      | 35.697        | PP N | 0.3284      | 5321.45215   | 270.08963    | 97.7512 |
| 2      | 41.961        | MP N | 0.2300      | 122.42458    | 8.87006      | 2.2488  |

Totals : 5443.87673 278.95969

\*\*\* End of Report \*\*\*

# Compound 4

Data File D:\JACK\YZG\XXG000553.D

Sample Name: Fc77

=====  
Acq. Operator : Yzg

Location : Vial 1

Injection Date : 11-Mar-17, 14:28:35

Acq. Method : YIZHE SUN.M

Analysis Method : D:\JACK\YIZHE SUN\YIZHE SUN.M

Last changed : 3/15/2017 8:27:57 PM by wzl

(modified after loading)

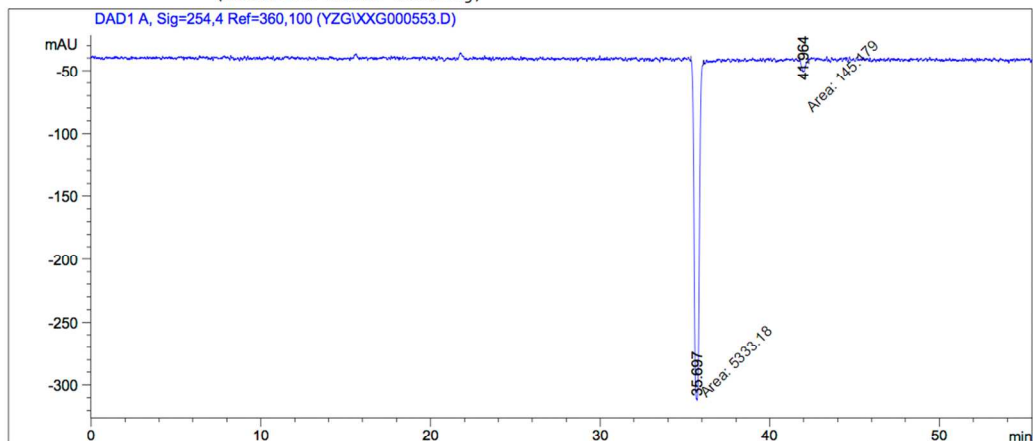

=====  
Area Percent Report  
=====

Sorted By : Signal  
Multiplier : 1.0000  
Dilution : 1.0000  
Sample Amount : 1.00000 [ng/ul] (not used in calc.)  
Use Multiplier & Dilution Factor with ISTDs

Signal 1: DAD1 A, Sig=254,4 Ref=360,100

| Peak # | RetTime [min] | Type | Width [min] | Area [mAU*s] | Height [mAU] | Area %  |
|--------|---------------|------|-------------|--------------|--------------|---------|
| 1      | 35.697        | MP N | 0.3288      | 5333.17773   | 270.36365    | 97.3500 |
| 2      | 41.964        | PM N | 0.2561      | 145.17870    | 9.44740      | 2.6500  |

Totals : 5478.35643 279.81105

=====  
\*\*\* End of Report \*\*\*



# Compound 5

Data File D:\JACK\MH\MH000080.D

Sample Name: Fc 79

=====  
Acq. Operator : MH  
Location : Vial 1  
Injection Date : 25-May-17, 16:43:42  
Method : D:\JACK\YIZHE SUN\YIZHE SUN.M  
Sample Info : 28ACN

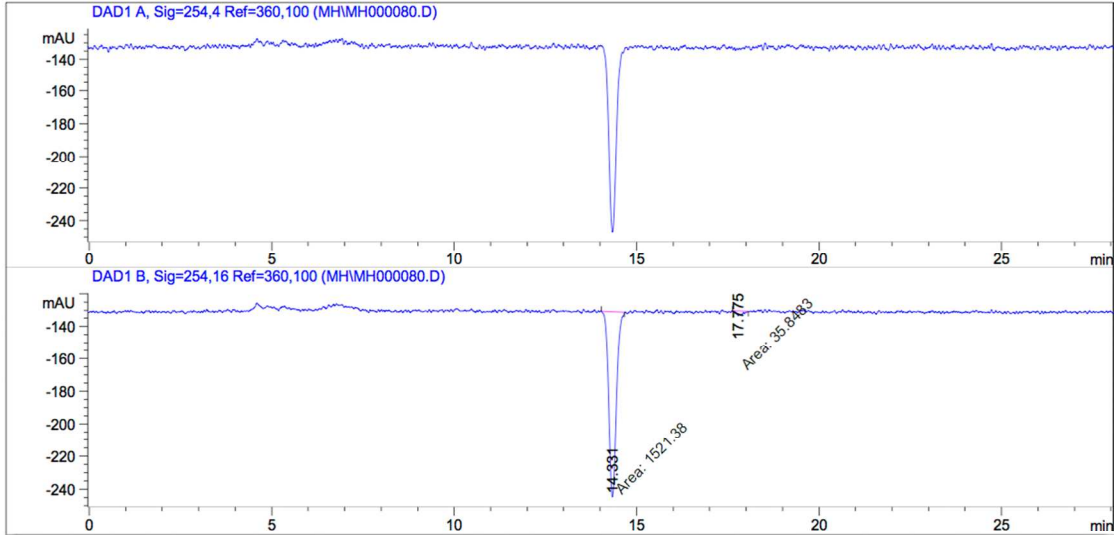

=====  
Area Percent Report  
=====

Sorted By : Signal  
Multiplier : 1.0000  
Dilution : 1.0000  
Use Multiplier & Dilution Factor with ISTDs

Signal 1: DAD1 B, Sig=254,16 Ref=360,100

| Peak # | RetTime [min] | Type | Width [min] | Area [mAU*s] | Height [mAU] | Area %  |
|--------|---------------|------|-------------|--------------|--------------|---------|
| 1      | 14.331        | PP N | 0.2231      | 1521.38330   | 113.63955    | 97.6979 |
| 2      | 17.775        | MM N | 0.2116      | 35.84830     | 2.82298      | 2.3021  |

Totals : 1557.23161 116.46253

=====  
\*\*\* End of Report \*\*\*



# Compound 7

Data File D:\JACK\YZG\YZG000137.D

Sample Name: Fc83

```
=====
Acq. Operator   : YZG
Acq. Instrument : LC 1200                      Location : Vial 1
Injection Date  : 3/30/2017 10:40:12 AM
Acq. Method     : D:\JACK\YIZHESUN.M
Last changed    : 3/30/2017 10:39:23 AM by YZG
                  (modified after loading)
Analysis Method : D:\JACK\YIZHE SUN\YIZHE SUN.M
Sample Info     : 25%
```

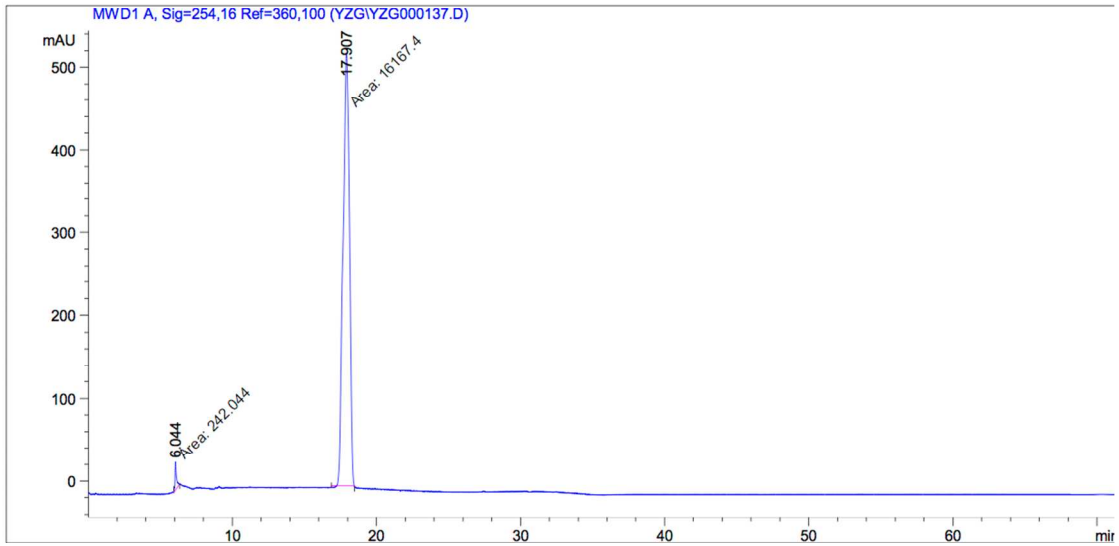

## Fraction Information

Fraction collection off

No Fractions found.

## Area Percent Report

```
Sorted By      : Signal
Multiplier     : 1.0000
Dilution       : 1.0000
Use Multiplier & Dilution Factor with ISTDs
Signal 1: MWD1 A, Sig=254,16 Ref=360,100
```

| Peak # | RetTime [min] | Type | Width [min] | Area [mAU*s] | Height [mAU] | Area %  |
|--------|---------------|------|-------------|--------------|--------------|---------|
| 1      | 6.044         | MM   | 0.1161      | 242.04439    | 34.73186     | 1.4750  |
| 2      | 17.907        | MM   | 0.5147      | 1.61674e4    | 523.52673    | 98.5250 |

Totals : 1.64094e4 558.25859

\*\*\* End of Report \*\*\*

# Compound 8

Data File D:\JACK\YZG\GSH\_1000030.D

Sample Name: FC84

=====  
Acq. Operator : YZG

Location : Vial 1

Injection Date : 11-Mar-17, 14:28:35

Acq. Method : YIZHE SUN.M

Analysis Method : D:\JACK\YIZHE SUN\YIZHE SUN.M

Last changed : 3/15/2017 8:27:57 PM by wzl

(modified after loading)

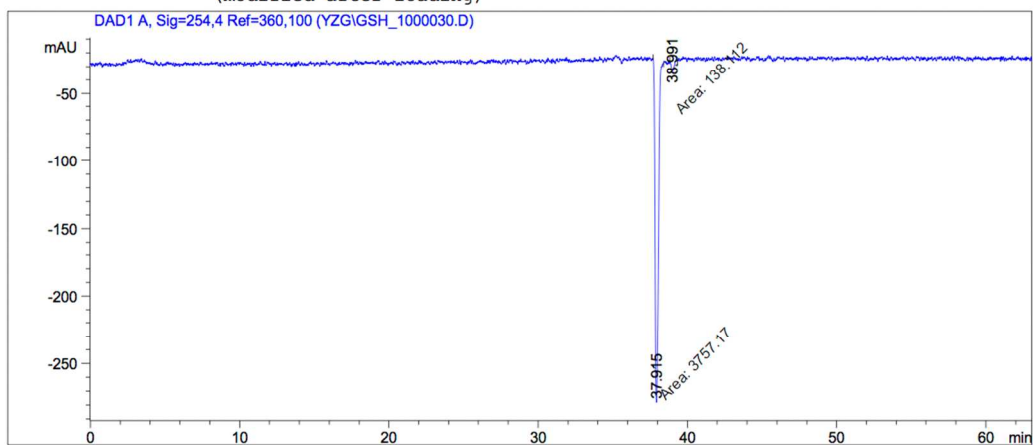

=====  
Area Percent Report  
=====

Sorted By : Signal  
Multiplier : 1.0000  
Dilution : 1.0000  
Use Multiplier & Dilution Factor with ISTDs

Signal 1: DAD1 A, Sig=254,4 Ref=360,100

| Peak # | RetTime [min] | Type | Width [min] | Area [mAU*s] | Height [mAU] | Area %  |
|--------|---------------|------|-------------|--------------|--------------|---------|
| 1      | 37.915        | PP N | 0.2475      | 3757.17114   | 252.97966    | 96.4544 |
| 2      | 38.991        | PM N | 0.2627      | 138.11179    | 8.76226      | 3.5456  |

Totals : 3895.28293 261.74192

=====  
\*\*\* End of Report \*\*\*  
=====

# Compound 9

Data File D:\JACK\YZG\T000726.D

Sample Name: FC85-100%

```
=====
Acq. Operator   : YZG
Acq. Instrument : LC 1200                      Location : Vial 1
Injection Date  : 5/16/2017 7:46:20 AM
Acq. Method     : D:\JACK\YIZHESUN.M
Last changed    : 5/16/2017 7:35:12 AM by YZG
                  (modified after loading)
Analysis Method : D:\JACK\YIZHE SUN\YIZHE SUN.M
Sample Info     : 5%-85% 100MIN
=====
```

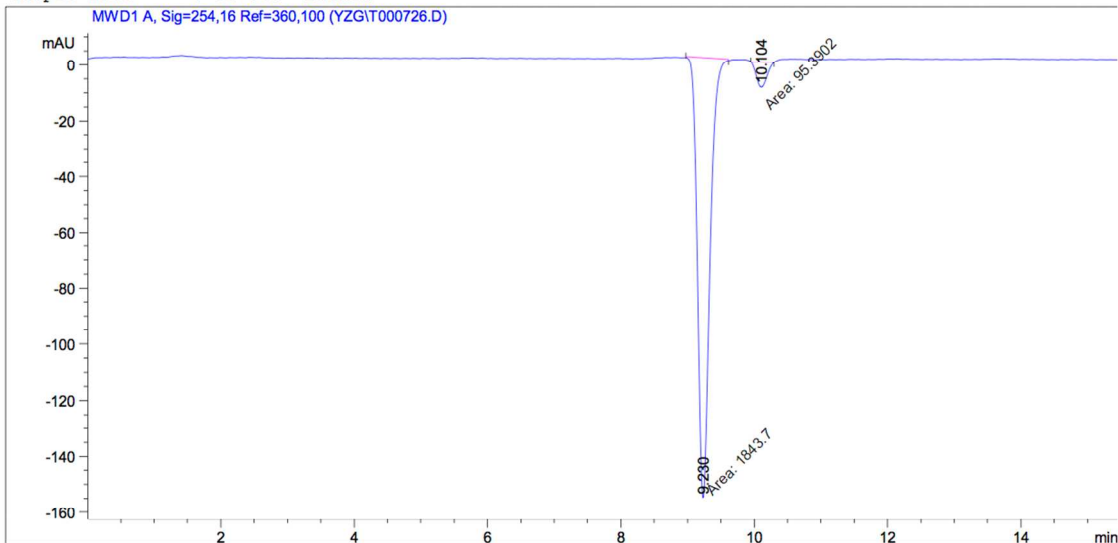

## Fraction Information

Fraction collection off

No Fractions found.

## Area Percent Report

```
Sorted By      : Signal
Multiplier     : 1.0000
Dilution       : 1.0000
Use Multiplier & Dilution Factor with ISTDs
Signal 1: MWD1 A, Sig=254,16 Ref=360,100
```

| Peak # | RetTime [min] | Type | Width [min] | Area [mAU*s] | Height [mAU] | Area %  |
|--------|---------------|------|-------------|--------------|--------------|---------|
| 1      | 9.230         | MM N | 0.1953      | 1843.70142   | 157.36546    | 95.0807 |
| 2      | 10.104        | PM N | 0.1774      | 95.39015     | 8.96282      | 4.9193  |

Totals : 1939.09157 166.32829

\*\*\* End of Report \*\*\*

## References:

1. Zhou, B.; Jiang, P.; Lu, J.; Xing, C. Characterization of the Fluorescence Properties of 4-Dialkylaminochalcones and Investigation of the Cytotoxic Mechanism of Chalcones. *Archiv der Pharmazie* **2016**, *349*, (7), 539-52.
2. Ikeda, S. I.; Kimura, U.; Ashizawa, T.; Gomi, K.; Saito, H.; Kasai, M.; Kanazawa, J.; Sasaki, K.; Nukui, E.; Okabe, M.; Sato, S. Propenone Derivatives. U.S. 5,952,355, 1999.
3. He, W.; Wang, Q.; Srinivasan, B.; Xu, J.; Padilla, M. T.; Li, Z.; Wang, X.; Liu, Y.; Gou, X.; Shen, H. M.; Xing, C.; Lin, Y. A JNK-mediated autophagy pathway that triggers c-IAP degradation and necroptosis for anticancer chemotherapy. *Oncogene* **2014**, *33*, (23), 3004-13.
4. Srinivasan, B.; Johnson, T. E.; Lad, R.; Xing, C. Structure-activity relationship studies of chalcone leading to 3-hydroxy-4,3',4',5'-tetramethoxychalcone and its analogues as potent nuclear factor kappaB inhibitors and their anticancer activities. *Journal of medicinal chemistry* **2009**, *52*, (22), 7228-35.
5. Zhang, Y.; Srinivasan, B.; Xing, C.; Lu, J. A new chalcone derivative (E)-3-(4-methoxyphenyl)-2-methyl-1-(3,4,5-trimethoxyphenyl)prop-2-en-1-one suppresses prostate cancer involving p53-mediated cell cycle arrests and apoptosis. *Anticancer research* **2012**, *32*, (9), 3689-98.
6. Zhou, B.; Yu, X.; Zhuang, C.; Villalta, P.; Lin, Y.; Lu, J.; Xing, C. Unambiguous Identification of beta-Tubulin as the Direct Cellular Target Responsible for the Cytotoxicity of Chalcone by Photoaffinity Labeling. *ChemMedChem* **2016**, *11*, (13), 1436-45.
7. Kumar, D.; Kumar, N. M.; Akamatsu, K.; Kusaka, E.; Harada, H.; Ito, T. Synthesis and biological evaluation of indolyl chalcones as antitumor agents. *Bioorg Med Chem Lett* **2010**, *20*, (13), 3916-9.
8. Haider, N.; Käferböck, J. Intramolecular [4+2] cycloaddition reactions of indolylalkylpyridazines: synthesis of annulated carbazoles. *Tetrahedron* **2004**, *60*, (31), 6495-6507.
9. Gupta, M. K.; Misra, K. Atom-based 3D-QSAR, molecular docking and molecular dynamics simulation assessment of inhibitors for thyroid hormone receptor alpha and beta. *Journal of molecular modeling* **2014**, *20*, (6), 2286.
